# Supplementary material
Source: PubMed Central journal article supplement (PMC6913105)
Supplement: Supp_Table1.pdf [file Supp_Table1.pdf]

## Supplementary Data

SUPPLEMENTARY TABLE S1. SEXUAL ORIENTATION AND OTHER ENUMERATED CHARACTERISTICS IN STATE ANTI-BULLYING STATUTES, UNITED STATES

| State      | <i>Antibullying statute includes sexual orientation as an enumerated characteristic</i> | <i>Antibullying statute includes any enumerated characteristic</i> | <i>Included in analysis (randomly selected to be included in the national sample of the YRBS)</i> | <i>Clause in statutes that enumerate any personal characteristics</i>                                                                                                                                                                                                                                                                                                                                                                                                                | <i>Antibullying statute(s)</i>       |
|------------|-----------------------------------------------------------------------------------------|--------------------------------------------------------------------|---------------------------------------------------------------------------------------------------|--------------------------------------------------------------------------------------------------------------------------------------------------------------------------------------------------------------------------------------------------------------------------------------------------------------------------------------------------------------------------------------------------------------------------------------------------------------------------------------|--------------------------------------|
| Alabama    | No                                                                                      | No                                                                 | Yes                                                                                               |                                                                                                                                                                                                                                                                                                                                                                                                                                                                                      | ALA. CODE § 16-28B-1 et seq.         |
| Alaska     | No                                                                                      | No                                                                 | No                                                                                                |                                                                                                                                                                                                                                                                                                                                                                                                                                                                                      | ALASKA STAT. § 14.33.200 et seq.     |
| Arizona    | No                                                                                      | No                                                                 | Yes                                                                                               |                                                                                                                                                                                                                                                                                                                                                                                                                                                                                      | ARIZ. REV. STAT. § 15-2301.          |
| Arkansas   | Yes                                                                                     | Yes                                                                | No                                                                                                | “(1) ‘Attribute’ means an actual or perceived personal characteristic including without limitation race, color, religion, ancestry, national origin, socioeconomic status, academic status, disability, gender, gender identity, physical appearance, health condition, or sexual orientation”; ARK. CODE ANN. § 6-18-514(b)(1).                                                                                                                                                     | ARK. CODE ANN. § 6-18-514.           |
| California | Yes                                                                                     | Yes                                                                | Yes                                                                                               | “(a) Adopted a policy that prohibits discrimination, harassment, intimidation, and bullying based on the actual or perceived characteristics set forth in Section 422.55 of the Penal Code and Section 220 of this code, and disability, gender, gender identity, gender expression, nationality, race or ethnicity, religion, sexual orientation, or association with a person or group with one or more of these actual or perceived characteristics.” CAL. EDUC. CODE § 234.1(a). | CAL. EDUC. CODE §§ 200 et seq.       |
| Colorado   | Yes                                                                                     | Yes                                                                | Yes                                                                                               | “(f) The schools in the district are subject to all federal and state laws and constitutional provisions prohibiting discrimination on the basis of disability, race, creed, color, sex, sexual orientation, national origin, religion, ancestry, or need for special education services”; Colo. Rev. Stat. § 22-32-109 (1)(f)(f). These characteristics are incorporated into the anti-bullying statute by reference. COLO. REV. STAT. § 22-32-109.1(b).                            | COLO. REV. STAT. § 22-93-101 et seq. |

*(continued)*

SUPPLEMENTARY TABLE S1. (CONTINUED)

| State       | Antibullying statute includes sexual orientation as an enumerated characteristic | Antibullying statute includes any enumerated characteristic | Included in analysis (randomly selected to be included in the national sample of the YRBS) | Clause in statutes that enumerate any personal characteristics                                                                                                                                                                                                                                                                                                                                                                                                                                                                                                                                                                                                                                  | Antibullying statute(s)                                                            |
|-------------|----------------------------------------------------------------------------------|-------------------------------------------------------------|--------------------------------------------------------------------------------------------|-------------------------------------------------------------------------------------------------------------------------------------------------------------------------------------------------------------------------------------------------------------------------------------------------------------------------------------------------------------------------------------------------------------------------------------------------------------------------------------------------------------------------------------------------------------------------------------------------------------------------------------------------------------------------------------------------|------------------------------------------------------------------------------------|
| Connecticut | Yes                                                                              | Yes                                                         | Yes                                                                                        | “‘Bullying’ shall include, but not be limited to, a written, oral or electronic communication or physical act or gesture based on any actual or perceived differentiating characteristic, such as race, color, religion, ancestry, national origin, gender, sexual orientation, gender identity or expression, socioeconomic status, academic status, physical appearance, or mental, physical, developmental or sensory disability, or by association with an individual or group who has or is perceived to have one or more of such characteristics.” CONN. GEN. STAT. § 10-222d(1).                                                                                                         | CONN. GEN. STAT. §§ 10-222d; 10-222g; 10-222h; 10-222i; 10-222j; 10-222k; 10-222l. |
| Delaware    | Yes                                                                              | Yes                                                         | No                                                                                         | “‘A requirement that each school have a procedure for the administration to promptly investigate in a timely manner and determine whether bullying has occurred, and that such procedure include investigation of such instances, including a determination of whether the target of the bullying was targeted or reports being targeted wholly or in part due to the target’s race, age, marital status, creed, religion, color, sex, disability, sexual orientation, gender identity or expression, or national origin. This subsection does not preclude schools from identifying other reasons or criteria why a person is a target of bullying.’” DEL. CODE ANN. tit. 14, § 4164(b)(2)(f). | DEL. CODE ANN. tit. 14, §§ 4161; 4164.                                             |
| Florida     | No                                                                               | Yes                                                         | Yes                                                                                        | “‘Bullying’ includes cyberbullying and means systematically and chronically inflicting physical hurt or psychological distress on one or more students and may involve...sexual, religious, or racial harassment.’” FLA. STAT. § 1006.147(3)(a).                                                                                                                                                                                                                                                                                                                                                                                                                                                | FLA. STAT. § 1006.147.                                                             |
| Georgia     | No                                                                               | No                                                          | Yes                                                                                        |                                                                                                                                                                                                                                                                                                                                                                                                                                                                                                                                                                                                                                                                                                 | GA. CODE ANN. § 20-2-751.4.                                                        |
| Hawaii      | No                                                                               | No                                                          | No                                                                                         |                                                                                                                                                                                                                                                                                                                                                                                                                                                                                                                                                                                                                                                                                                 | HAW. REV. STAT. §302A.                                                             |
| Idaho       | No                                                                               | No                                                          | Yes                                                                                        |                                                                                                                                                                                                                                                                                                                                                                                                                                                                                                                                                                                                                                                                                                 | IDAHO CODE ANN. § 18-917A.                                                         |

(continued)

SUPPLEMENTARY TABLE S1. (CONTINUED)

| State     | Antibullying statute includes sexual orientation as an enumerated characteristic | Antibullying statute includes any enumerated characteristic | Included in analysis (randomly selected to be included in the national sample of the YRBS) | Clause in statutes that enumerate any personal characteristics                                                                                                                                                                                                                                                                                                                                                                                                                                                                                                                                             | Antibullying statute(s)              |
|-----------|----------------------------------------------------------------------------------|-------------------------------------------------------------|--------------------------------------------------------------------------------------------|------------------------------------------------------------------------------------------------------------------------------------------------------------------------------------------------------------------------------------------------------------------------------------------------------------------------------------------------------------------------------------------------------------------------------------------------------------------------------------------------------------------------------------------------------------------------------------------------------------|--------------------------------------|
|           | Yes                                                                              | Yes                                                         | Yes                                                                                        |                                                                                                                                                                                                                                                                                                                                                                                                                                                                                                                                                                                                            |                                      |
| Illinois  | No                                                                               | No                                                          | Yes                                                                                        | “Bullying on the basis of actual or perceived race, color, religion, sex, national origin, ancestry, age, marital status, physical or mental disability, military status, sexual orientation, gender-related identity or expression, unfavorable discharge from military service, association with a person or group with one or more of the aforementioned actual or perceived characteristics, or any other distinguishing characteristic is prohibited in all school districts, charter schools, and nonpublic, nonsectarian elementary and secondary schools.” 105 ILL. COMP. STAT. ANN. 5/27-23.7(a). | 105 ILL. COMP. STAT. ANN. 5/27-23.7  |
| Indiana   | No                                                                               | No                                                          | Yes                                                                                        |                                                                                                                                                                                                                                                                                                                                                                                                                                                                                                                                                                                                            | IND. CODE § 20-33-8-0.2 et seq.      |
| Iowa      | Yes                                                                              | Yes                                                         | No                                                                                         | “‘Trait or characteristic of the student’ includes but is not limited to age, color, creed, national origin, race, religion, marital status, sex, sexual orientation, gender identity, physical attributes, physical or mental ability or disability, ancestry, political party preference, political belief, socioeconomic status, or familial status.” IOWA CODE 280-28(2)(c).                                                                                                                                                                                                                           | IOWA CODE 280-28.                    |
| Kansas    | No                                                                               | No                                                          | No                                                                                         |                                                                                                                                                                                                                                                                                                                                                                                                                                                                                                                                                                                                            | KAN. STAT. ANN. § 72-8256.           |
| Kentucky  | No                                                                               | No                                                          | No                                                                                         |                                                                                                                                                                                                                                                                                                                                                                                                                                                                                                                                                                                                            | KY. REV. STAT. ANN. 158.148.         |
| Louisiana | No                                                                               | No                                                          | No                                                                                         |                                                                                                                                                                                                                                                                                                                                                                                                                                                                                                                                                                                                            | L.A. REV. STAT. ANN. § 17:416.13.    |
| Maine     | Yes                                                                              | Yes                                                         | No                                                                                         | “Bullying may be motivated by a student’s actual or perceived race; color; religion; national origin; ancestry or ethnicity; sexual orientation; socioeconomic status; age; physical, mental, emotional or learning disability; gender; gender identity and expression; physical appearance; weight; family status; or other distinguishing personal characteristics or may be based on association with another person identified with such a characteristic.” ME. REV. STAT. ANN. tit. 20, § 6554(1).                                                                                                    | ME. REV. STAT. ANN. tit. 20, § 6554. |

(continued)

SUPPLEMENTARY TABLE S1. (CONTINUED)

| <i>State</i>  | <i>Antibullying statute includes sexual orientation as an enumerated characteristic</i> | <i>Antibullying statute includes any enumerated characteristic</i> | <i>Included in analysis (randomly selected to be included in the national sample of the YRBS)</i> | <i>Clause in statutes that enumerate any personal characteristics</i>                                                                                                                                                                                                                                                                                                                                                                                                                                                                                                                                                                                                                                                                                                                                                                                                                                                                                                        | <i>Antibullying statute(s)</i>            |
|---------------|-----------------------------------------------------------------------------------------|--------------------------------------------------------------------|---------------------------------------------------------------------------------------------------|------------------------------------------------------------------------------------------------------------------------------------------------------------------------------------------------------------------------------------------------------------------------------------------------------------------------------------------------------------------------------------------------------------------------------------------------------------------------------------------------------------------------------------------------------------------------------------------------------------------------------------------------------------------------------------------------------------------------------------------------------------------------------------------------------------------------------------------------------------------------------------------------------------------------------------------------------------------------------|-------------------------------------------|
| Maryland      | Yes                                                                                     | Yes                                                                | Yes                                                                                               | “Motivated by an actual or perceived personal characteristic including race, national origin, marital status, sex, sexual orientation, gender identity, religion, ancestry, physical attribute, socioeconomic status, familial status, or physical or mental ability or disability.” MD. CODE ANN., EDUC. § 7-424.1(a)(2)(i)(1).                                                                                                                                                                                                                                                                                                                                                                                                                                                                                                                                                                                                                                             | MD. CODE ANN., EDUC. §§ 7-424.1; 7-424.3. |
| Massachusetts | Yes                                                                                     | Yes                                                                | Yes                                                                                               | “Each plan shall recognize that certain students may be more vulnerable to becoming a target of bullying or harassment based on actual or perceived differentiating characteristics, including race, color, religion, ancestry, national origin, sex, socioeconomic status, homelessness, academic status, gender identity or expression, physical appearance, pregnant or parenting status, sexual orientation, mental, physical, developmental or sensory disability or by association with a person who has or is perceived to have 1 or more of these characteristics.” MASS. GEN. LAWS ch. 71, § 370(d)(3).                                                                                                                                                                                                                                                                                                                                                             | MASS. GEN. LAWS ch. 71, § 370.            |
| Michigan      | No                                                                                      | No                                                                 | Yes                                                                                               |                                                                                                                                                                                                                                                                                                                                                                                                                                                                                                                                                                                                                                                                                                                                                                                                                                                                                                                                                                              | MICH. COMP. LAWS § 380.1310b.             |
| Minnesota     | Yes                                                                                     | Yes                                                                | Yes                                                                                               | “Intimidating, threatening, abusive, or harming conduct may involve, but is not limited to, conduct that causes physical harm to a student or a student’s property or causes a student to be in reasonable fear of harm to person or property; under Minnesota common law, violates a student’s reasonable expectation of privacy, defames a student, or constitutes intentional infliction of emotional distress against a student; is directed at any student or students, including those based on a person’s actual or perceived race, ethnicity, color, creed, religion, national origin, immigration status, sex, marital status, familial status, socioeconomic status, physical appearance, sexual orientation, including gender identity and expression, academic status related to student performance, disability, or status with regard to public assistance, age, or any additional characteristic defined in chapter 363A.” 2017 MINN. STAT. § 121A.031(2)(g). | MINN. STAT. § 121A.031(2)(g).             |
| Mississippi   | No                                                                                      | No                                                                 | No                                                                                                |                                                                                                                                                                                                                                                                                                                                                                                                                                                                                                                                                                                                                                                                                                                                                                                                                                                                                                                                                                              | MISS. CODE ANN. § 37-11-67.               |
| Missouri      | No                                                                                      | No                                                                 | Yes                                                                                               |                                                                                                                                                                                                                                                                                                                                                                                                                                                                                                                                                                                                                                                                                                                                                                                                                                                                                                                                                                              | MO. REV. STAT. § 160.775.                 |

(continued)

SUPPLEMENTARY TABLE S1. (CONTINUED)

| State         | Antibullying statute includes sexual orientation as an enumerated characteristic | Antibullying statute includes any enumerated characteristic | Included in analysis (randomly selected to be included in the national sample of the YRBS) | Clause in statutes that enumerate any personal characteristics                                                                                                                                                                                                                                                                                                                                                                                                                                                                                                                                                                                                                                                                    | Antibullying statute(s)                |
|---------------|----------------------------------------------------------------------------------|-------------------------------------------------------------|--------------------------------------------------------------------------------------------|-----------------------------------------------------------------------------------------------------------------------------------------------------------------------------------------------------------------------------------------------------------------------------------------------------------------------------------------------------------------------------------------------------------------------------------------------------------------------------------------------------------------------------------------------------------------------------------------------------------------------------------------------------------------------------------------------------------------------------------|----------------------------------------|
| Montana       | No                                                                               | No                                                          | No                                                                                         |                                                                                                                                                                                                                                                                                                                                                                                                                                                                                                                                                                                                                                                                                                                                   | MONT. CODE ANN. § 20-5-207 et seq.     |
| Nebraska      | No                                                                               | No                                                          | No                                                                                         |                                                                                                                                                                                                                                                                                                                                                                                                                                                                                                                                                                                                                                                                                                                                   | NEB. REV. STAT. Ch. 79, § 2, 137.      |
| Nevada        | Yes                                                                              | Yes                                                         | Yes                                                                                        | “Actual or perceived race, color, national origin, ancestry, religion, gender identity or expression, sexual orientation, physical or mental disability of a person, sex or any other distinguishing characteristic or background of a person; or [a]ssociation of a person with another person having one or more of those actual or perceived characteristics.” NEV. REV. STAT. § 388.122(1)(c).                                                                                                                                                                                                                                                                                                                                | NEV. REV. STAT. § 388.121 et seq.      |
| New Hampshire | Yes                                                                              | Yes                                                         | No                                                                                         | “Bullying in schools has historically included actions shown to be motivated by a pupil’s actual or perceived race, color, religion, national origin, ancestry or ethnicity, sexual orientation, socioeconomic status, age, physical, mental, emotional, or learning disability, gender, identity and expression, obesity, or other distinguishing personal characteristics, or based on association with any person identified in any of the above categories.” N.H. REV. STAT. ANN. § 193-F:2.                                                                                                                                                                                                                                  | N.H. REV. STAT. ANN. § 193-F:1 et seq. |
| New Jersey    | Yes                                                                              | Yes                                                         | Yes                                                                                        | “‘Harassment, intimidation or bullying’ means any gesture, any written, verbal or physical act, or any electronic communication, whether it be a single incident or a series of incidents, that is reasonably perceived as being motivated either by any actual or perceived characteristic, such as race, color, religion, ancestry, national origin, gender, sexual orientation, gender identity and expression, or a mental, physical or sensory disability, or by any other distinguishing characteristic, that takes place on school property, at any school-sponsored function, on a school bus, or off school grounds as provided for in section 16 of P.L.2010, c.122 (C.18A:37-15.3)...” N.J. STAT. ANN. § 18A:37-14(2). | N.J. STAT. ANN. § 18A:37-13 et seq.    |
| New Mexico    | No                                                                               | No                                                          | Yes                                                                                        |                                                                                                                                                                                                                                                                                                                                                                                                                                                                                                                                                                                                                                                                                                                                   | N.M. STAT. § 32A-25-1 et seq.          |

(continued)

SUPPLEMENTARY TABLE S1. (CONTINUED)

| State          | Antibullying statute includes sexual orientation as an enumerated characteristic | Antibullying statute includes any enumerated characteristic | Included in analysis (randomly selected to be included in the national sample of the YRBS) | Clause in statutes that enumerate any personal characteristics                                                                                                                                                                                                                                                                                                                                                                                                                                                                                  | Antibullying statute(s)                      |
|----------------|----------------------------------------------------------------------------------|-------------------------------------------------------------|--------------------------------------------------------------------------------------------|-------------------------------------------------------------------------------------------------------------------------------------------------------------------------------------------------------------------------------------------------------------------------------------------------------------------------------------------------------------------------------------------------------------------------------------------------------------------------------------------------------------------------------------------------|----------------------------------------------|
| New York       | Yes                                                                              | Yes                                                         | Yes                                                                                        | “Acts of harassment and bullying shall include, but not be limited to, those acts based on a person’s actual or perceived race, color, weight, national origin, ethnic group, religion, religious practice, disability, sexual orientation, gender or sex.” N.Y. EDUC. LAW § 11(7).                                                                                                                                                                                                                                                             | N.Y. EDUC. LAW § 10 et seq.                  |
| North Carolina | Yes                                                                              | Yes                                                         | No                                                                                         | “Bullying or harassing behavior includes, but is not limited to, acts reasonably perceived as being motivated by any actual or perceived differentiating characteristic, such as race, color, religion, ancestry, national origin, gender, socioeconomic status, academic status, gender identity, physical appearance, sexual orientation, or mental, physical, developmental, or sensory disability, or by association with a person who has or is perceived to have one or more of these characteristics.” N.C. GEN. STAT. § 115C-407.15(a). | N.C. GEN. STAT. §§ 115C-407.15; 115C-407.16. |
| North Dakota   | No                                                                               | No                                                          | No                                                                                         |                                                                                                                                                                                                                                                                                                                                                                                                                                                                                                                                                 | N.D. CENT. CODE § 15.1-19-17 et seq.         |
| Ohio           | No                                                                               | No                                                          | Yes                                                                                        |                                                                                                                                                                                                                                                                                                                                                                                                                                                                                                                                                 | OHIO REV. CODE ANN. §§ 3313.666; 3313.667    |
| Oklahoma       | No                                                                               | No                                                          | Yes                                                                                        |                                                                                                                                                                                                                                                                                                                                                                                                                                                                                                                                                 | OKLA. STAT. tit. 70, § 24-100.2 et seq.      |
| Oregon         | Yes                                                                              | Yes                                                         | No                                                                                         | “‘Protected class’ means a group of persons distinguished, or perceived to be distinguished, by race, color, religion, sex, sexual orientation, national origin, marital status, familial status, source of income or disability.” OR. REV. STAT. § 339.351(3).                                                                                                                                                                                                                                                                                 | OR. REV. STAT. § 339.350 et seq.             |
| Pennsylvania   | No                                                                               | No                                                          | Yes                                                                                        |                                                                                                                                                                                                                                                                                                                                                                                                                                                                                                                                                 | 24PA. STAT. ANN. § 13-1303.1-A.              |
| Rhode Island   | Yes                                                                              | Yes                                                         | Yes                                                                                        | “The expression, physical act or gesture may include, but is not limited to, an incident or incidents that may be reasonably perceived as being motivated by characteristics such as race, color, religion, ancestry, national origin, gender, sexual orientation, gender identity and expression or mental, physical, or sensory disability, intellectual ability or by any other distinguishing characteristic.” R.I. GEN. LAWS § 16-21-33(a)(v).                                                                                             | R.I. GEN. LAWS §§ 16-21-33, 16-21-34.        |

(continued)

SUPPLEMENTARY TABLE S1. (CONTINUED)

| <i>State</i>   | <i>Antibullying statute includes sexual orientation as an enumerated characteristic</i> | <i>Antibullying statute includes any enumerated characteristic</i> | <i>Included in analysis (randomly selected to be included in the national sample of the YRBS)</i> | <i>Clause in statutes that enumerate any personal characteristics</i>                                                                                                                                                                                                                                                                                                                                                                                                                                                                                                                                                                                                          | <i>Antibullying statute(s)</i>        |
|----------------|-----------------------------------------------------------------------------------------|--------------------------------------------------------------------|---------------------------------------------------------------------------------------------------|--------------------------------------------------------------------------------------------------------------------------------------------------------------------------------------------------------------------------------------------------------------------------------------------------------------------------------------------------------------------------------------------------------------------------------------------------------------------------------------------------------------------------------------------------------------------------------------------------------------------------------------------------------------------------------|---------------------------------------|
| South Carolina | No                                                                                      | No                                                                 | No                                                                                                |                                                                                                                                                                                                                                                                                                                                                                                                                                                                                                                                                                                                                                                                                | S.C. CODE ANN. § 59-63-110 et seq.    |
| South Dakota   | No                                                                                      | No                                                                 | No                                                                                                |                                                                                                                                                                                                                                                                                                                                                                                                                                                                                                                                                                                                                                                                                | S.D. CODIFIED LAWS § 13-32-14 et seq. |
| Tennessee      | No                                                                                      | No                                                                 | Yes                                                                                               |                                                                                                                                                                                                                                                                                                                                                                                                                                                                                                                                                                                                                                                                                | TENN. CODE ANN. § 49-6-4501 et seq.   |
| Texas          | No                                                                                      | No                                                                 | Yes                                                                                               |                                                                                                                                                                                                                                                                                                                                                                                                                                                                                                                                                                                                                                                                                | TEX. EDUC. CODE ANN. § 37.0832.       |
| Utah           | No                                                                                      | No                                                                 | No                                                                                                |                                                                                                                                                                                                                                                                                                                                                                                                                                                                                                                                                                                                                                                                                | UTAH CODE ANN. § 53A-11a-101 et seq.  |
| Vermont        | Yes                                                                                     | Yes                                                                | No                                                                                                | <p>“‘Harassment’ means an incident or incidents of verbal, written, visual, or physical conduct, including any incident conducted by electronic means, based on or motivated by a student’s or a student’s family member’s actual or perceived race, creed, color, national origin, marital status, sex, sexual orientation, gender identity, or disability that has the purpose or effect of objectively and substantially undermining and detracting from or interfering with a student’s educational performance or access to school resources or creating an objectively intimidating, hostile, or offensive environment.”</p> <p>Vt. STAT. ANN. tit. 16, § 11(26)(A).</p> | Vt. STAT. ANN. tit. 16, § 570 et seq. |
| Virginia       | No                                                                                      | No                                                                 | No                                                                                                |                                                                                                                                                                                                                                                                                                                                                                                                                                                                                                                                                                                                                                                                                | VA. CODE ANN. § 22.1-291.4.           |
| Washington     | Yes                                                                                     | Yes                                                                | Yes                                                                                               | <p>“...race, color, religion, ancestry, national origin, gender, sexual orientation, or mental, physical, or sensory handicap...” RCW § 9A.36.080.</p> <p>These characteristics are incorporated into the anti-bullying statute by reference. WASH. REV. CODE § 28A.300.285(2).</p>                                                                                                                                                                                                                                                                                                                                                                                            | WASH. REV. CODE § 28A.300.285.        |
| West Virginia  | No                                                                                      | No                                                                 | Yes                                                                                               |                                                                                                                                                                                                                                                                                                                                                                                                                                                                                                                                                                                                                                                                                | W. VA. CODE § 18-C-1 et seq.          |
| Wisconsin      | No                                                                                      | No                                                                 | No                                                                                                |                                                                                                                                                                                                                                                                                                                                                                                                                                                                                                                                                                                                                                                                                | Wis. STAT. § 118.46.                  |
| Wyoming        | No                                                                                      | No                                                                 | No                                                                                                |                                                                                                                                                                                                                                                                                                                                                                                                                                                                                                                                                                                                                                                                                | WYO. STAT. ANN. 21-311 et seq.        |
